# Supplementary material for: c-Abl phosphorylation of ΔNp63α is critical for cell viability
Source: PubMed Central journal article supplement — Cell Death Dis. 2010 Jan 21;1(1):e16–. doi: 10.1038/cddis.2009.15 (PMC3032504; doi:10.1038/cddis.2009.15), 2010-01-21
Supplement: cddis200915x1.pdf [file cddis200915x1.pdf]

# Supplementary Figure 1

## A

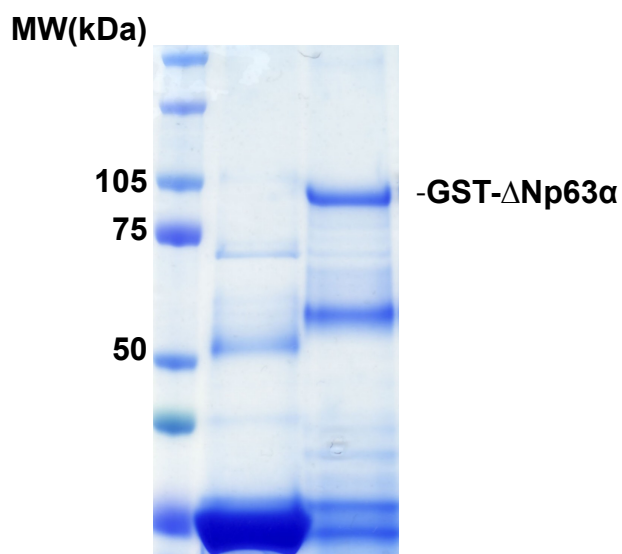

### Trypsin Digestion

- 1 SPDDELL **Y**#LPVR
- 2 AM\*PV**Y**#K
- 3 QTSIQSPSS **Y**#GNSSPPLNK

### Trypsin/Asp-N Digestion

- 1 DHAQNSVTAPSP **Y**#AQPSTF
- 2 EPQ **Y**#TNLGLLSM\*
- 3 QTSIQSPSS **Y**#GNSSPPLNK

## B

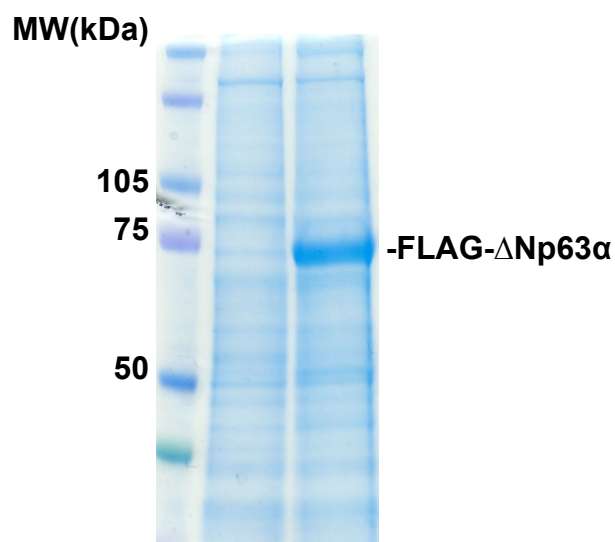

### Trypsin Digestion

- 1 SPDDELL **Y**#LPVR
- 2 LGCSSCLD **Y**#FTTQGLTTIYQIEHYSM\*DDLASLK
- 3 AMPV **Y**#K
- 4 L **Y**#CQIAK
- 5 ESLELMQ **Y**#LPQHTIETYR

### Trypsin/Asp-N Digestion

- 1 D **Y**#PGPHSF
- 2 SPDDELL **Y**#LPVR
- 3 AMPV **Y**#K
- 4 ELMQ **Y**#LPQHTIETYR
- 5 DYFTTQGLTTI **Y**#QIEHYSM\*
- 6 D **Y**#FTTQGLTTIYQIEHYSM\*
- 7 L **Y**#CQIAK
- 8 KL **Y**#CQIAK
- 9 ESLELMQ **Y**#LPQHTIETYR
- 10 DALSPSPAIPSNTD **Y**#PGPHSF
- 11 DELL **Y**#LPVR
