# Supplementary figures and images for: c-Abl phosphorylation of ΔNp63α is critical for cell viability
Source: PubMed Central journal article supplement — Cell Death Dis. 2010 Jan 21;1(1):e16–. doi: 10.1038/cddis.2009.15 (PMC3032504; doi:10.1038/cddis.2009.15), 2010-01-21

## Supplementary Figure 2

**A**

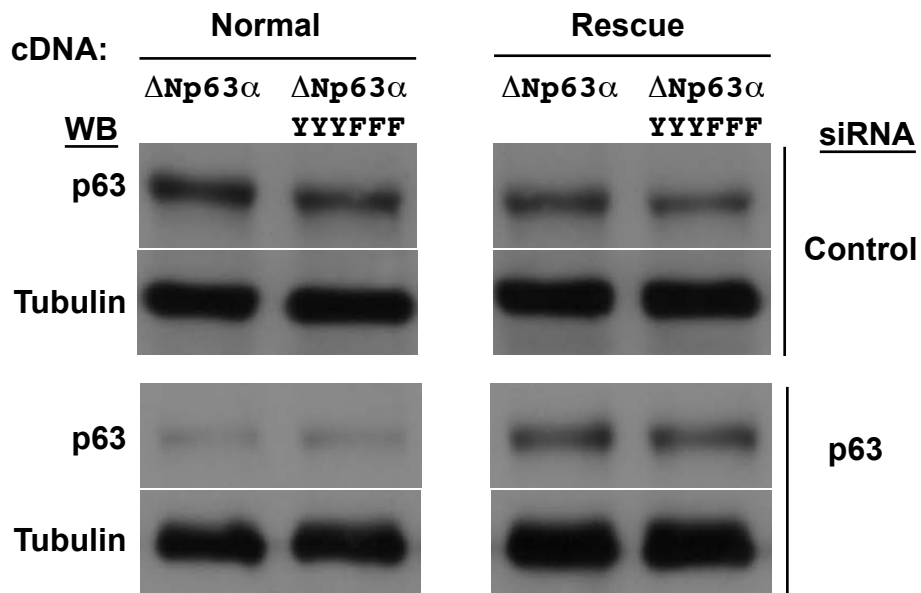

Supplement: cddis200915x2.pdf [file cddis200915x2.pdf]
